# Supplementary material for: Transcranial direct-current stimulation protects against cerebral ischemia-reperfusion injury through regulating Cezanne-dependent signaling
Source: Research Square preprint supplement (doi:10.21203/rs.3.rs-389968/v1), 2021-04-12
Supplement: Supplementary file 1 [file 66ee3d95990b934e30a42994.docx]

**Transcranial direct-current stimulation protects against cerebral ischemia-reperfusion injury through regulating Cezanne-dependent signaling**

Jing Chenga*, Yan-Qin Fanb*, Hong-Xiang Jianga, Song-Feng Chenc, Juan Chend, Xin-Yu Liaoe, Ying-Ying Zoue, Hai-yang Lanf, Yu Cuig, Zhi-Biao Chena, Qian-Xue Chena, Qi Wang

*a**Department of Neurosurgery, Renmin Hospital of Wuhan University,99 Zhang Zhidong Street, Wuhan 430060, China*

*bDepartment of Nephrology, Renmin Hospital of Wuhan University,99 Zhang Zhidong Street, Wuhan 430060, China*

*cDepartment of Physiology, School of Medicine, Wuhan University, 185 Donghu Street, Wuhan 430071, China*

*dDepartment of Neurology, the Central Hospital of Wuhan, Tongji Medical College of Huazhong University of Science & Technology, 26 Shengli Street, Wuhan 430013, China*

*eDepartment of Pathology and Pathophysiology, Faculty of Basic Medical Sciences, Kunming Medical University, 1168 West Chunrong Road, Kunming 650500, China*

*fDepartment of Orthopaedics, Army Medical Center (Daping Hospital),* *Army Medical University, Chongqing 400042, China*

*gInstitute of Neuroregeneration & Neurorehabilitation, Department of Pathophysiology, Qingdao University, 308 Ningxia Street, Qingdao 266071, China*

*These authors contributed equally to this work.

Correspondence:

Qi Wan, Institute of Neuroregeneration & Neurorehabilitation, Department of Pathophysiology, Qingdao University, 308 Ningxia Street, Qingdao 266071, China.

Email: qiwan1@hotmail.com

Qian-Xue Chen, Department of Neurosurgery, Renmin Hospital of Wuhan University, 99 Zhang Zhidong Rd, Wuhan 430060, China

Email: chenqx666@whu.edu.cn


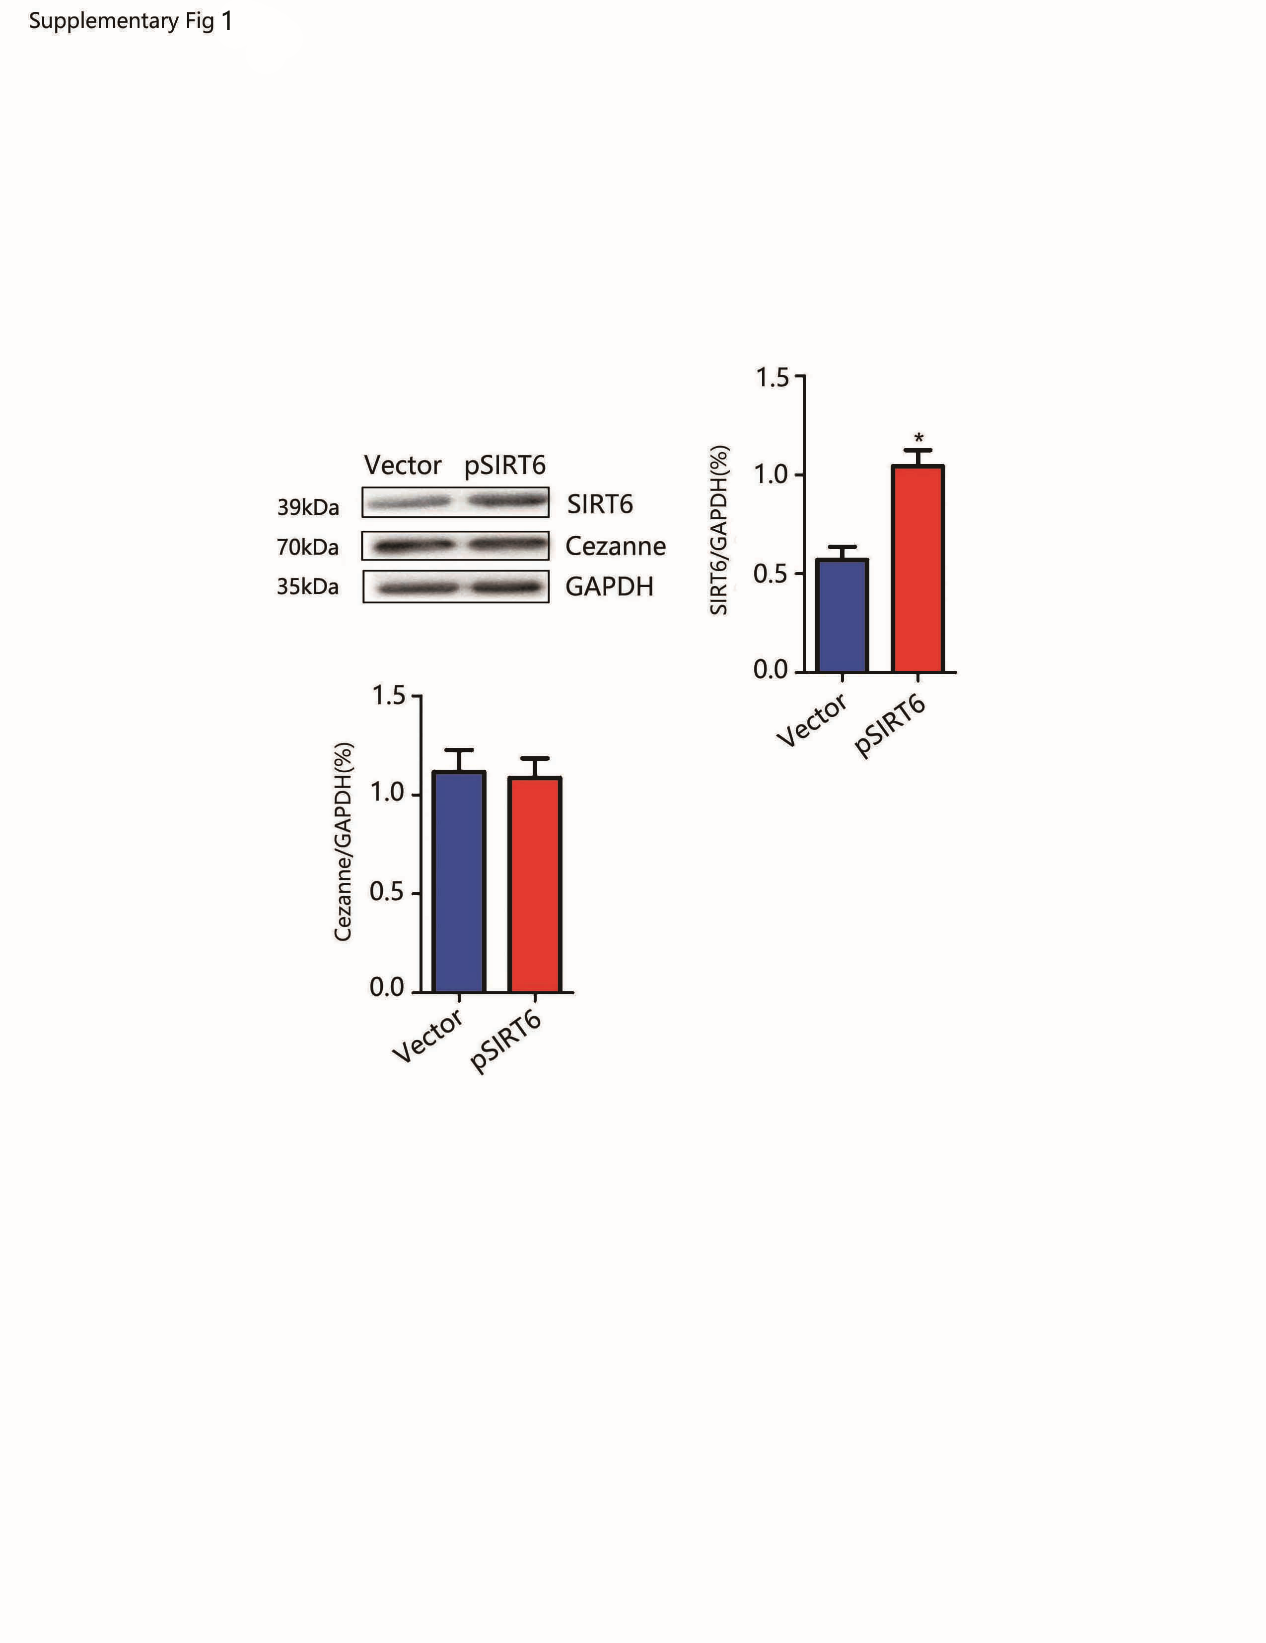


Supplementary figure 1. SIRT6 overexpression did not result in a signiﬁcant difference in Cezanne levels. Western blotting analysis showed that transfection of pcDNA3.1-SIRT6 plasmid in cultured cortical neurons did not result in a signiﬁcant difference in Cezanne levels. (n = 6 in each group, **p <0.01compared to Vector, Student's t-test). Vector: the cortical neurons transfected with the negative control with pcDNA3.1; pSIRT6: the cortical neurons transfected with SIRT6 plasmid with pcDNA3.1.


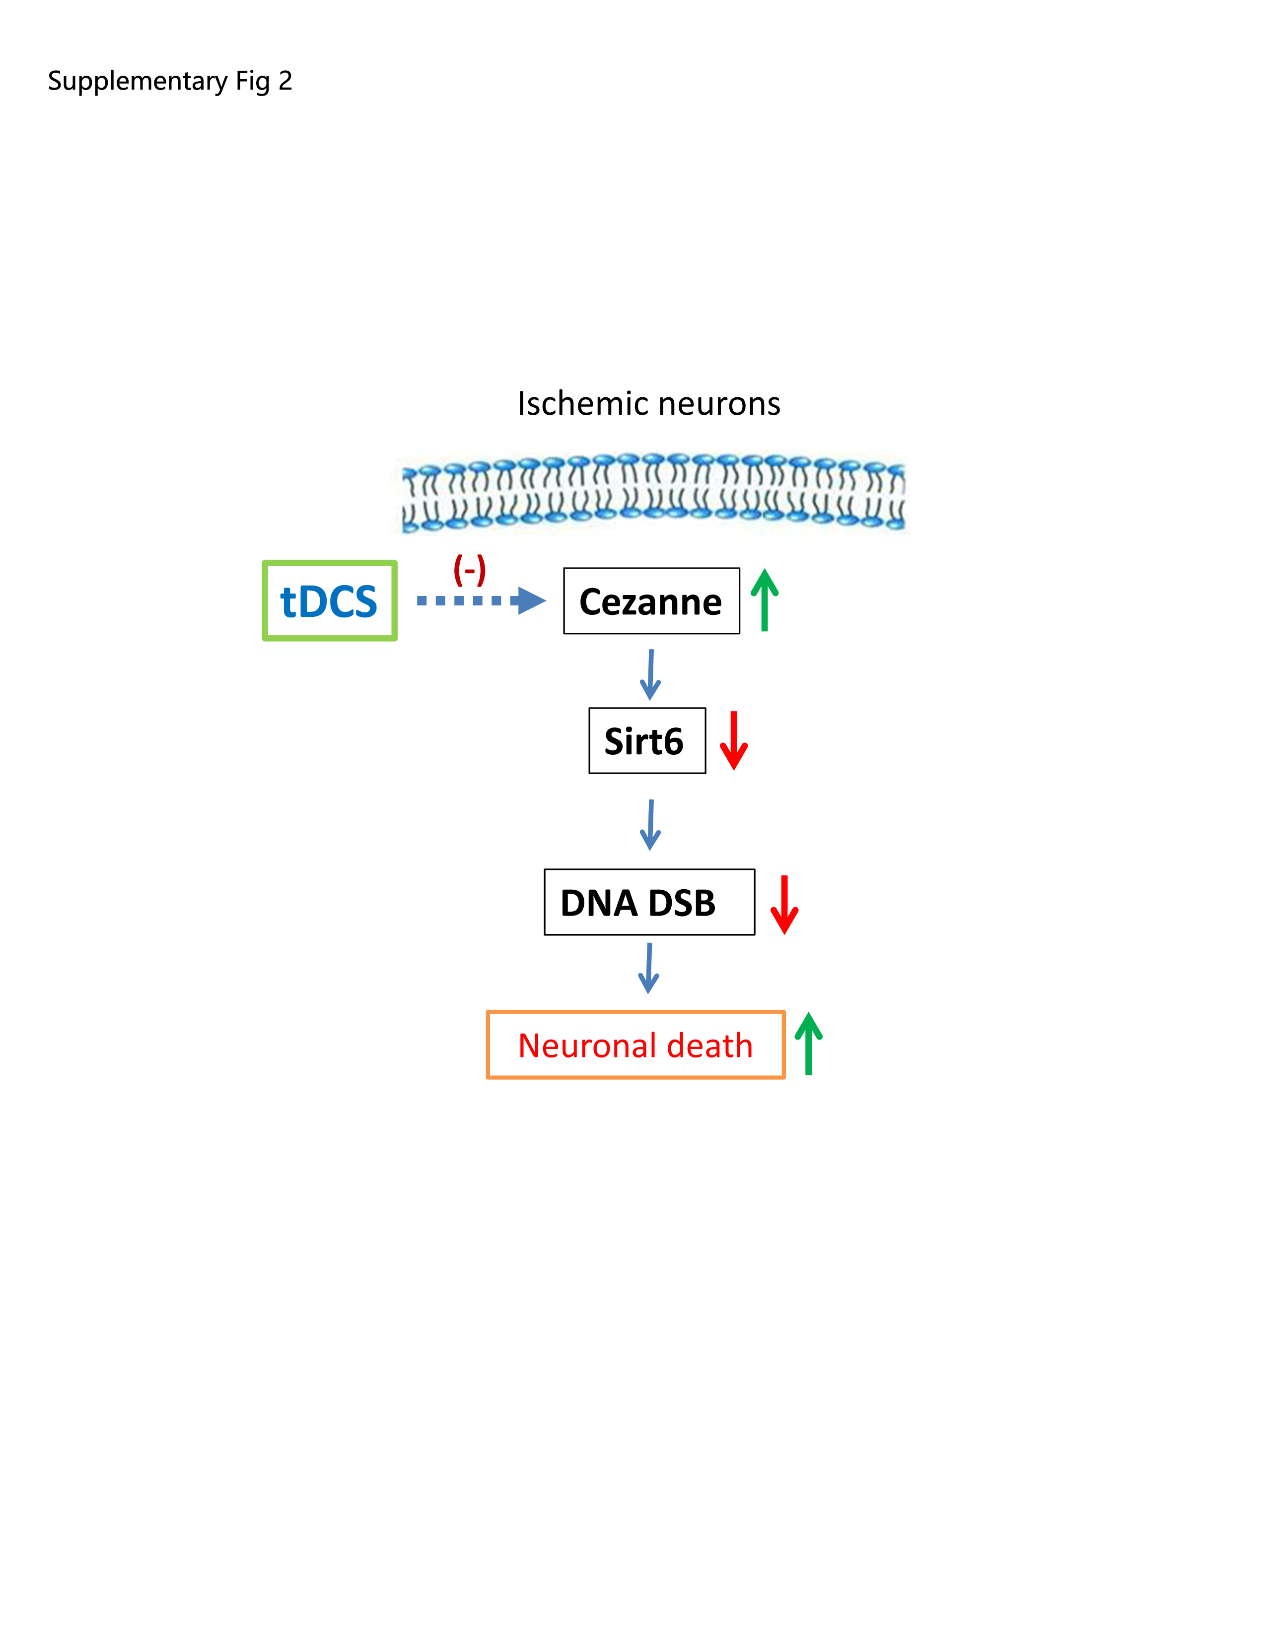


Supplementary figure 2. A schematic summary of the means by which tDCS protects against cerebral ischemia-reperfusion injury.
